# Supplementary material for: Metabolic Modulation and Potential Biomarkers of the Prognosis Identification for Severe Aortic Stenosis after TAVR by a Metabolomics Study
Source: Cardiol Res Pract. 2020 Oct 28;2020:3946913. doi: 10.1155/2020/3946913 (PMC7649585; doi:10.1155/2020/3946913)
Supplement: Supplementary Materials — Supplemental Figure s1: the impact of TAVR on heart function and hemodynamic parameter in patients with aortic stenosis. EF, left ventricular ejection fraction; LVM, left ventricular mass; LVMI, left ventricular mass index; pean, mean transaortic gradient; Vmax, maximum transaortic velocity. Supplemental Table s1: internal standard in liquid chromatography-mass spectrometry and gas chromatography-mass spectrometry. [file 3946913.f1.zip]

Archive with 2 entries (2 files):
- 3946913.f1/Supplemental Figures.pdf
- 3946913.f1/Supplemental table s1.doc
